CORRECTION

# Correction: The Centipede Genus *Scolopendra* in Mainland Southeast Asia: Molecular Phylogenetics, Geometric Morphometrics and External Morphology as Tools for Species Delimitation

The PLOS ONE Staff

## Notice of Republication

This article was republished on September 8, 2015, to correct the order of Figs. 3–5. Please download this article again to view the correct version. The originally published, uncorrected article and the republished, corrected article are provided here for reference.

## Supporting Information

**S1 File. Originally published, uncorrected article.**  
(PDF)

**S2 File. Republished, corrected article.**  
(PDF)

## Reference

1. Siriwt W, Edgecombe GD, Sutcharit C, Panha S (2015) The Centipede Genus *Scolopendra* in Mainland Southeast Asia: Molecular Phylogenetics, Geometric Morphometrics and External Morphology as Tools for Species Delimitation. PLoS ONE 10(8): e0135355. doi:[10.1371/journal.pone.0135355](https://doi.org/10.1371/journal.pone.0135355) PMID: [26270342](https://pubmed.ncbi.nlm.nih.gov/26270342/)

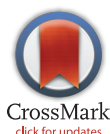

## OPEN ACCESS

**Citation:** The PLOS ONE Staff (2015) Correction: The Centipede Genus *Scolopendra* in Mainland Southeast Asia: Molecular Phylogenetics, Geometric Morphometrics and External Morphology as Tools for Species Delimitation. PLoS ONE 10(9): e0139182. doi:[10.1371/journal.pone.0139182](https://doi.org/10.1371/journal.pone.0139182)

**Published:** September 22, 2015

**Copyright:** © 2015 The PLOS ONE Staff. This is an open access article distributed under the terms of the [Creative Commons Attribution License](https://creativecommons.org/licenses/by/4.0/), which permits unrestricted use, distribution, and reproduction in any medium, provided the original author and source are credited.
